# Supplementary material for: Glycemic Effects of Moderate Alcohol Intake Among Patients With Type 2 Diabetes
Source: Oxford University Press journal article supplement (doi:10.2337/dc07-1103), 2007-11-27
Supplement: dc071103onlineappendix.doc [file dc071103onlineappendix.doc]

**Online Appendix Table 1-Design of the study.**

| **Week** | **0** | **1**  Randomization,  Intervention | **2** | **3** | **4** | **5** | **6** | **7** | **8** | **9** | **10** | **11** | **12** |
| --- | --- | --- | --- | --- | --- | --- | --- | --- | --- | --- | --- | --- | --- |
|  |  |  |  |  |  |  |  |  |  |  |  |  |  |
| **Visits** |  |  |  |  |  |  |  |  |  |  |  |  |  |
| Study coordinator | **√** | **√*** |  | **√*** |  | **√*** |  | **√*** |  | **√*** |  | **√*** | **√** |
| Dietitian |  | **√** |  |  |  |  |  | **√** |  |  |  |  | **√** |
| Physician |  | **√** |  |  |  |  |  | **√** |  |  |  |  | **√** |
|  |  |  |  |  |  |  |  |  |  |  |  |  |  |
| **Measurements** |  |  |  |  |  |  |  |  |  |  |  |  |  |
| Glucose 2h  test meal* 3 days | **√** |  |  |  |  | **√** |  |  |  |  |  |  | **√** |
| Blood draw | **√** |  |  |  |  |  |  |  |  |  |  |  | **√** |
| Weight | **√** |  |  |  |  |  |  | **√** |  |  |  |  | **√** |
| Waist circumference | **√** |  |  |  |  |  |  |  |  |  |  |  | **√** |
| Blood pressure | **√** |  |  |  |  |  |  | **√** |  |  |  |  | **√** |
|  |  |  |  |  |  |  |  |  |  |  |  |  |  |
| **Questionnaires** |  |  |  |  |  |  |  |  |  |  |  |  |  |
| **Inclusion/exclusion (#1)** | **√** |  |  |  |  |  |  |  |  |  |  |  |  |
| **Inform consent (#2)** | **√** |  |  |  |  |  |  |  |  |  |  |  |  |
| **Glucose test meal*3 days,**  **food diary (#3)** | **√** |  |  |  |  |  |  | **√** |  |  |  |  | **√** |
| **Clinical (#4)** |  | **√** |  |  |  |  |  | **√** |  |  |  |  | **√** |
| Symptoms, quality of life, adverse effects (#5) |  | **√** |  |  |  |  |  | **√** |  |  |  |  | **√** |
| **Adherence to dietary recommendations/ drink patterns**  **(#6)** |  | **√** |  |  |  |  |  | **√** |  |  |  |  | **√** |

##### Online Appendix Table 2. Baseline characteristics of the 109 randomized patients with type 2 diabetes.

| **Variable (STD)** | **Assigned Group** | | **p-value** |
| --- | --- | --- | --- |
|  | **Alcohol**  **n=75** | **Control**  **n=34** |  |
| Age, years | 61.1 (6.9) | 61.1 (6.7) | 0.97 |
| Men, % | 56 | 62 | 0.39 |
| Education, years | 13.5 (4.0) | 12.9 (4.0) | 0.45 |
| Duration of diabetes, years | 11.5 (8.4) | 12.5 (9.2) | 0.61 |
| BMI, kg/m2 | 29.9 (4.5) | 30.6 (5.0) | 0.52 |
| Waist circumference, cm | 99.1 (12.1) | 105.0 (16.1) | 0.14 |
| Smoking status, %  Current  Past  Never | 5.3  37.3  57.4 | 8.8  44.1  47.1 | 0.63 |
| Physically active,* % | 74.6 | 78.3 | 0.48 |
| Consume vitamins/minerals supplements, % | 36.5 | 47.8 | 0.48 |
| Systolic blood pressure, mm/Hg | 134.2 (16.8) | 132.4 (14.3) | 0.59 |
| Diastolic blood pressure, mm/Hg | 77.5 (10.7) | 74.1 (9.1) | 0.13 |

* at least 60 minutes of physical activity per week

**Online Appendix Table 3. Baseline characteristics by status of adherence.**

| **Variable (STD)** | **Status** | | **p-value** |
| --- | --- | --- | --- |
|  | **Completed the study n=91** | **Dropped out**  **n=18** |  |
| Age, years | 61.6 (6.4) | 58.1 (8.6) | 0.06 |
| Men, % | 67.0 | 55.5 | 0.58 |
| Education, years | 13.4 (3.7) | 12.5 (3.4) | 0.34 |
| BMI, kg/m2 | 30.1 (4.6) | 30.4 (5.2) | 0.81 |
| Fasting plasma glucose, mg/dL | 140.0 (36.9) | 167.1 (59.5) | 0.03 |
| HbA1c, % | 7.39 (1.2) | 7.40 (1.2) | 0.99 |
| Total Cholesterol/ HDL-c ratio | 3.87 (1.1) | 4.12 (1.0) | 0.50 |

**Online Appendix Figure 1. Flow chart of the alcohol intervention study**

201 Screened

126

Eligible

109 Randomized

34 Assigned to control

(non

-

alcoholic diet bear) group

5 Dropped out immediately after randomization

3 Due to scheduling conflicts

2 Due to illness

4 Dropped out during the intervention period

1 Due to gastric pain

1 Due to scheduling conflicts

2 Due to illness

66 Included in the Analysis

7 Dropped out immediately after randomization

6 Due to scheduling conflicts/ lack of motivation

2 Dropped out during the intervention period

1 Due to scheduling conflicts

1 Due to illness

25 Included in the Analysis

201 Screened

126

Eligible

109 Randomized

75 Assigned to alcohol group

34 Assigned to control

(non

-

alcoholic diet beer) group

3 Due to scheduling conflicts

2 Due to illness

4 Dropped out during the intervention period

1 Due to gastric pain

1 Due to scheduling conflicts

2 Due to illness

1 Due to illness

2 Dropped out during the intervention period

1 Due to scheduling conflicts

1 Due to illness

***12 weeks of intervention period***

**Online Appendix Figure 2. Symptoms/ adverse effects of moderate alcohol intake among patients with type 2 diabetes during 12 weeks of intervention**

Pv<0.001
